# Supplementary material for: S100a4 upregulation in Pik3caH1047R;Trp53R270H;MMTV-Cre-driven mammary tumors promotes metastasis
Source: PubMed Central journal article supplement (PMC6935129; doi:10.1186/s13058-019-1238-5), 2019-12-27
Supplement: 13058_2019_1238_MOESM1_ESM.pdf [file 13058_2019_1238_MOESM1_ESM.pdf]

A

**Primary breast samples (n = 4,485)**

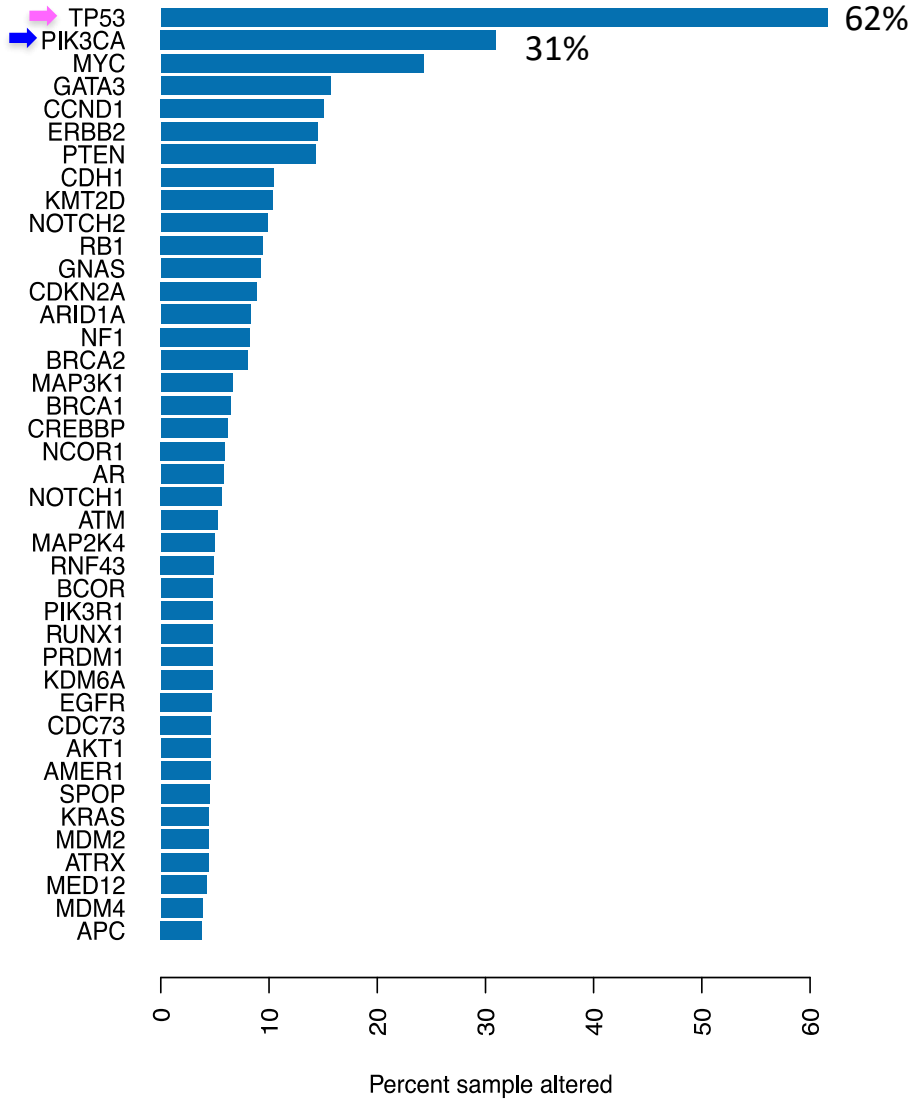

B

breast, total samples=4485

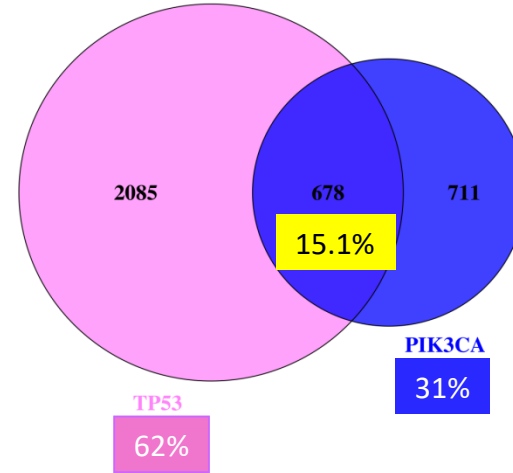

C

PIK3CA mutation =1389

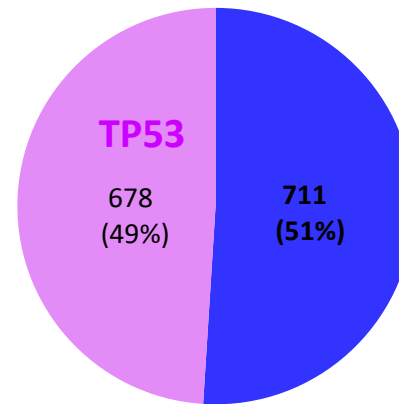



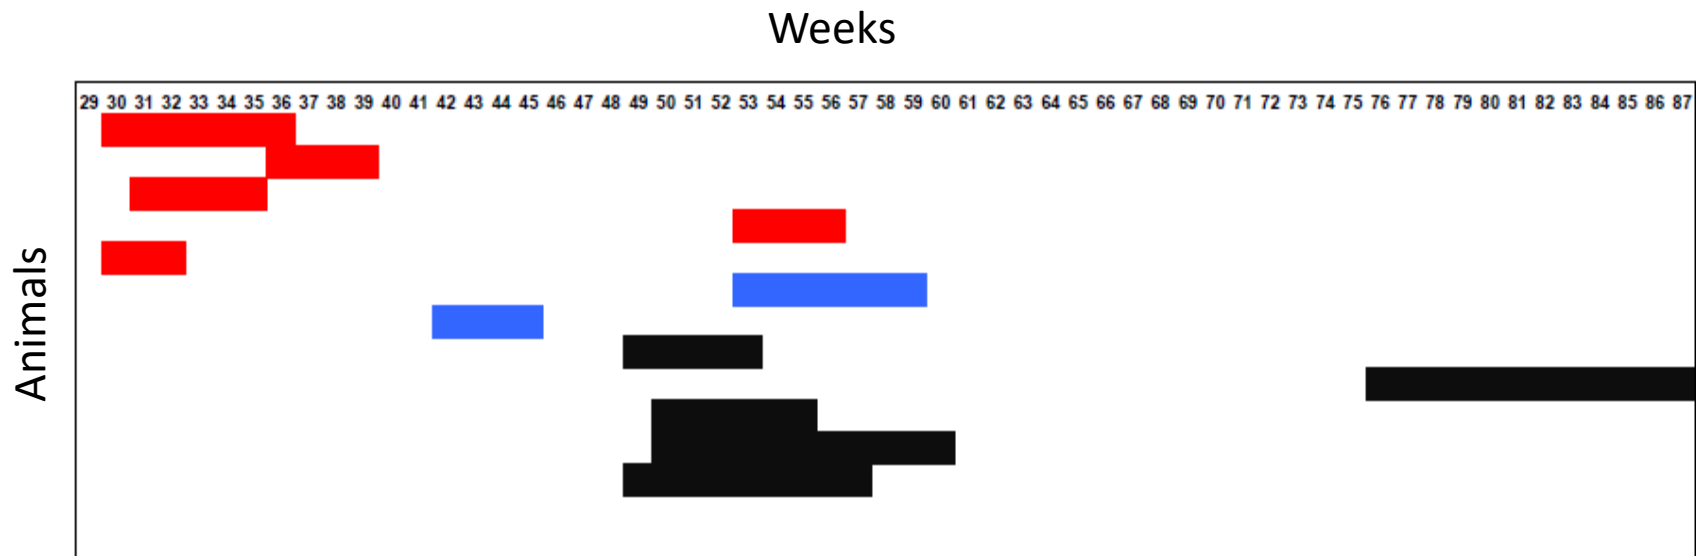

■ *Pik3ca*H1047R;*Trp53*R270H;*MMTV-cre*
■ *Pik3ca*H1047R;*MMTV-cre*
■ *Trp53*R270H;*MMTV-cre*

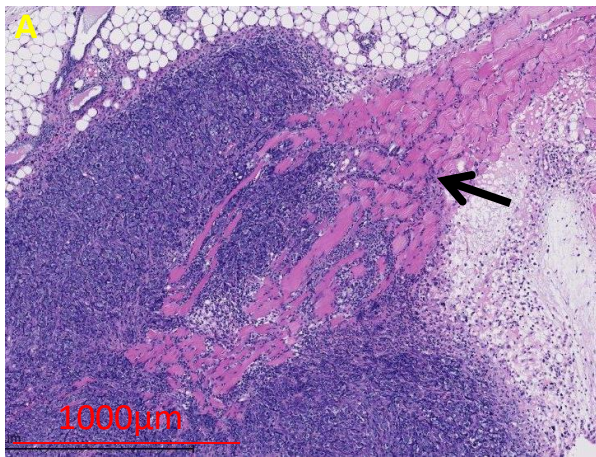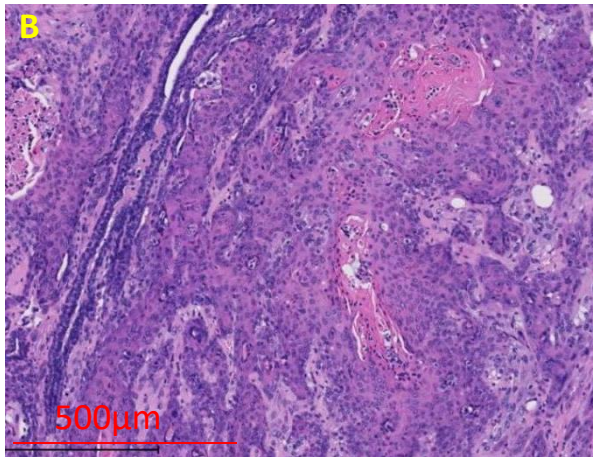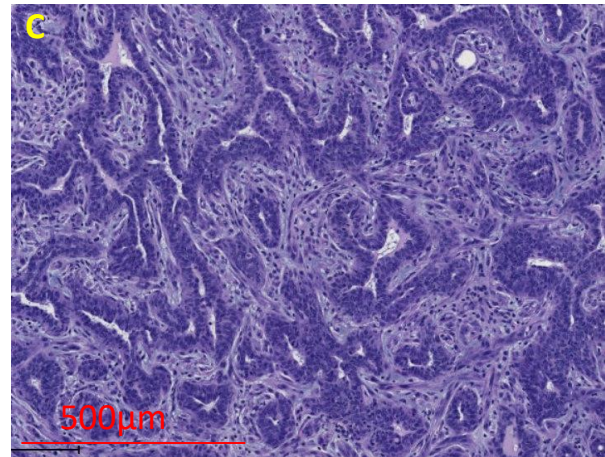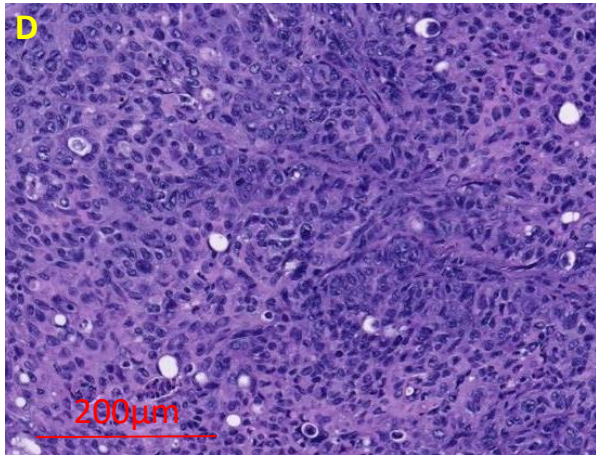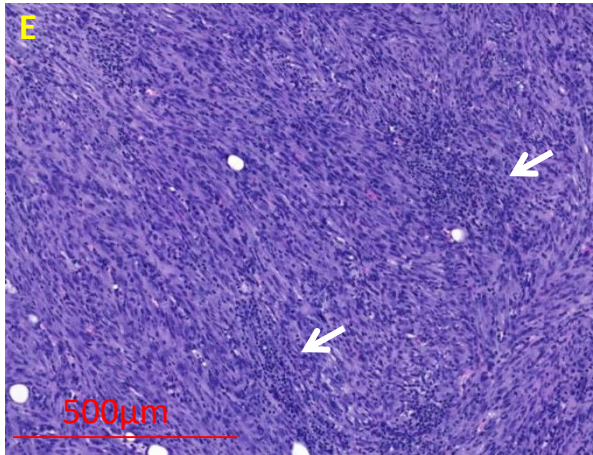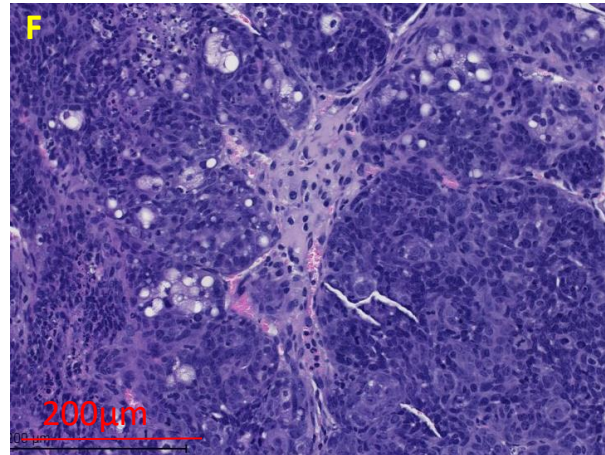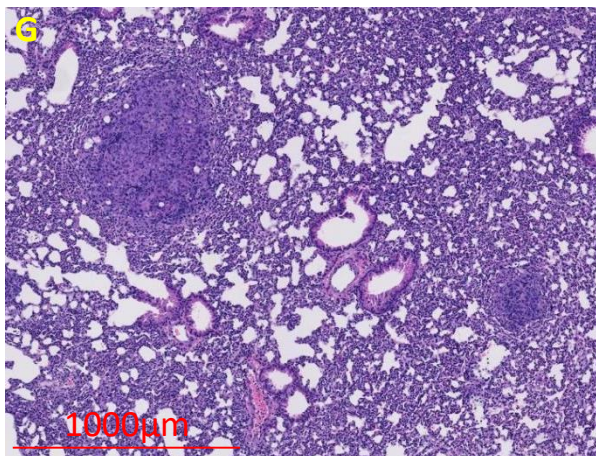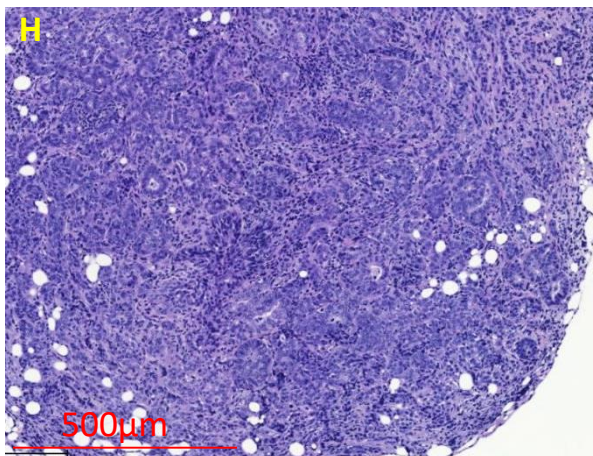

Supplementary Figure 4

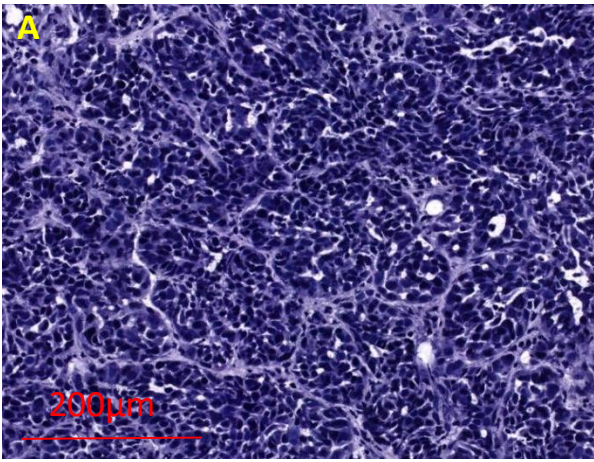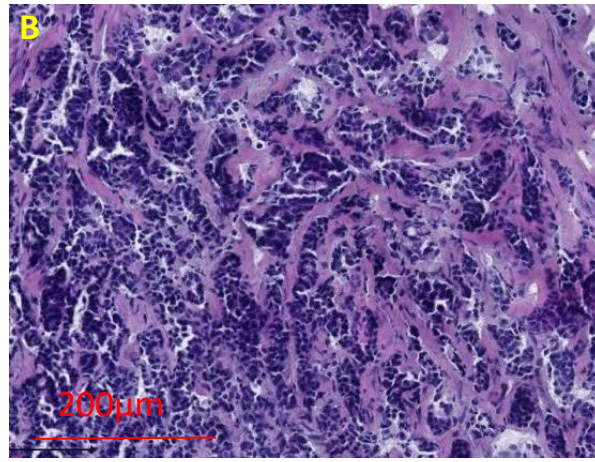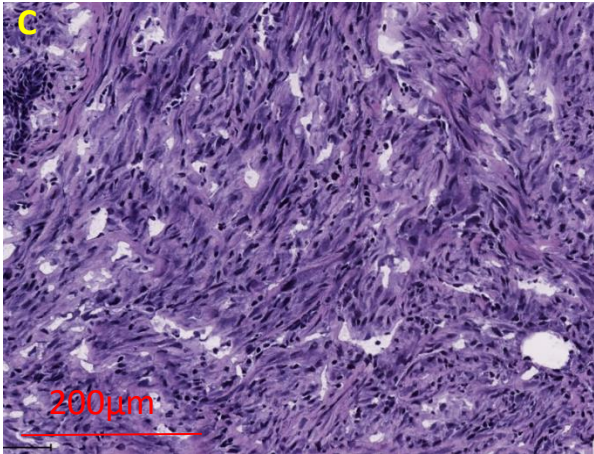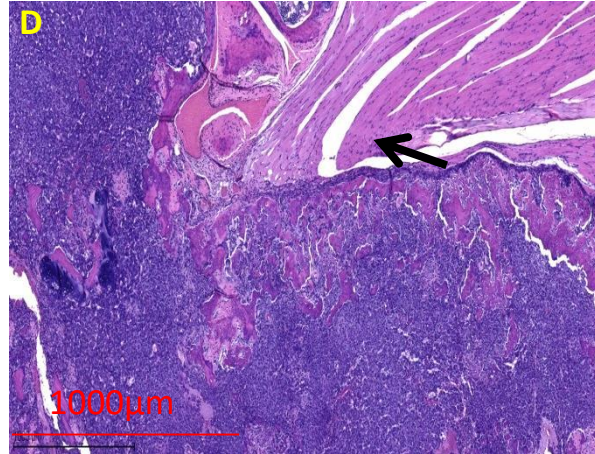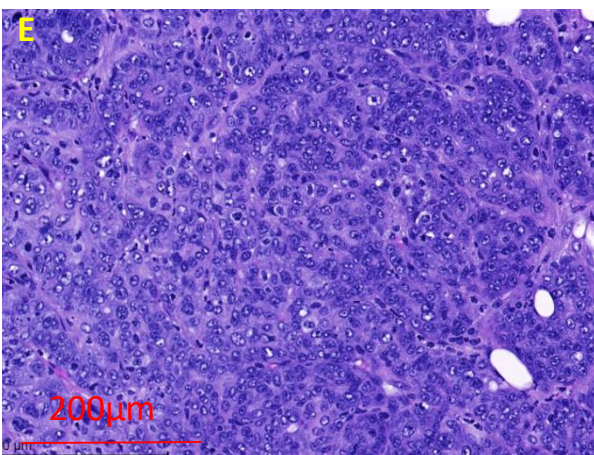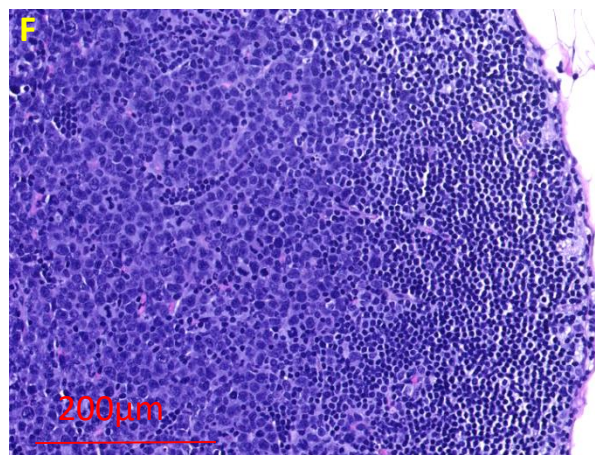

Supplementary Figure 5

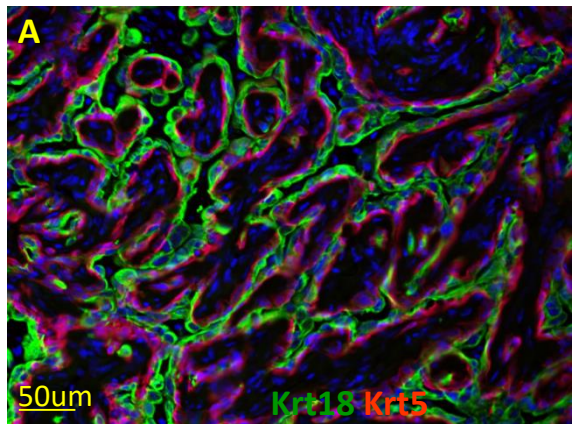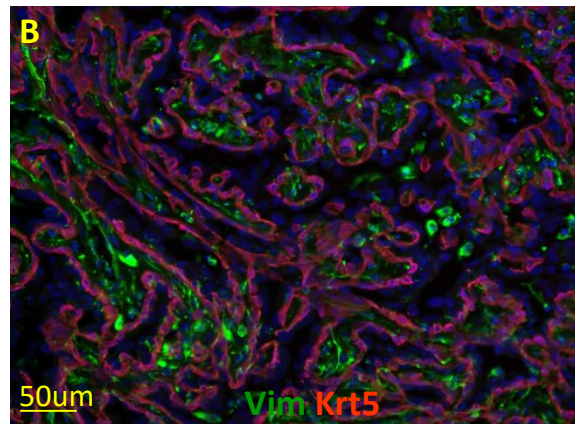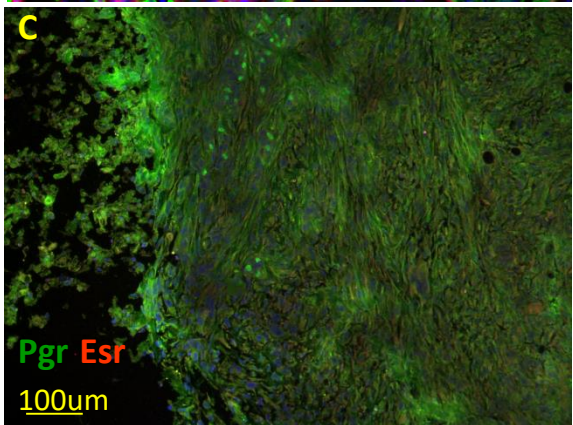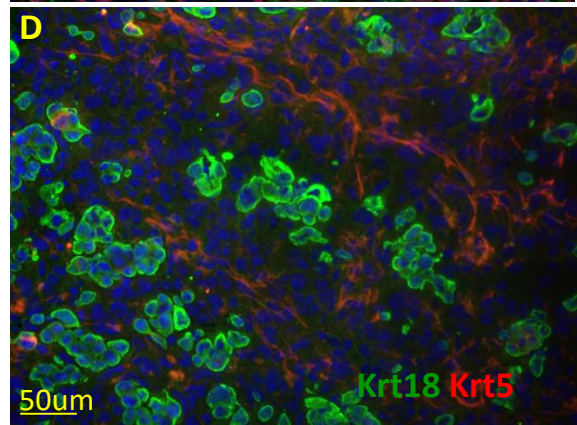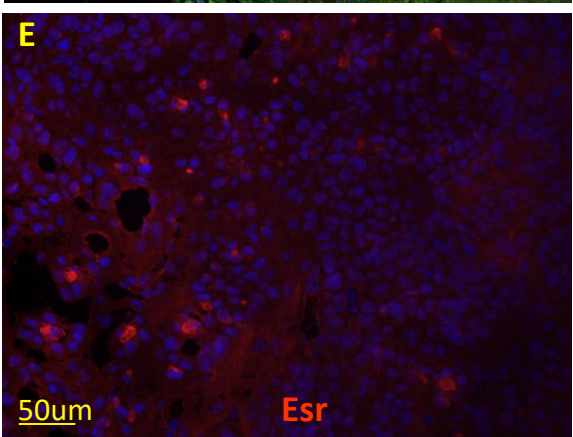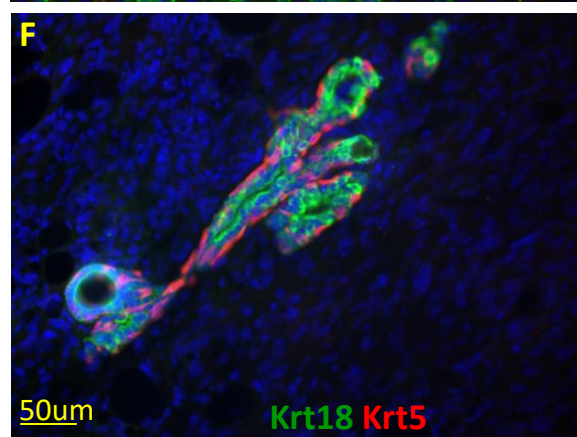

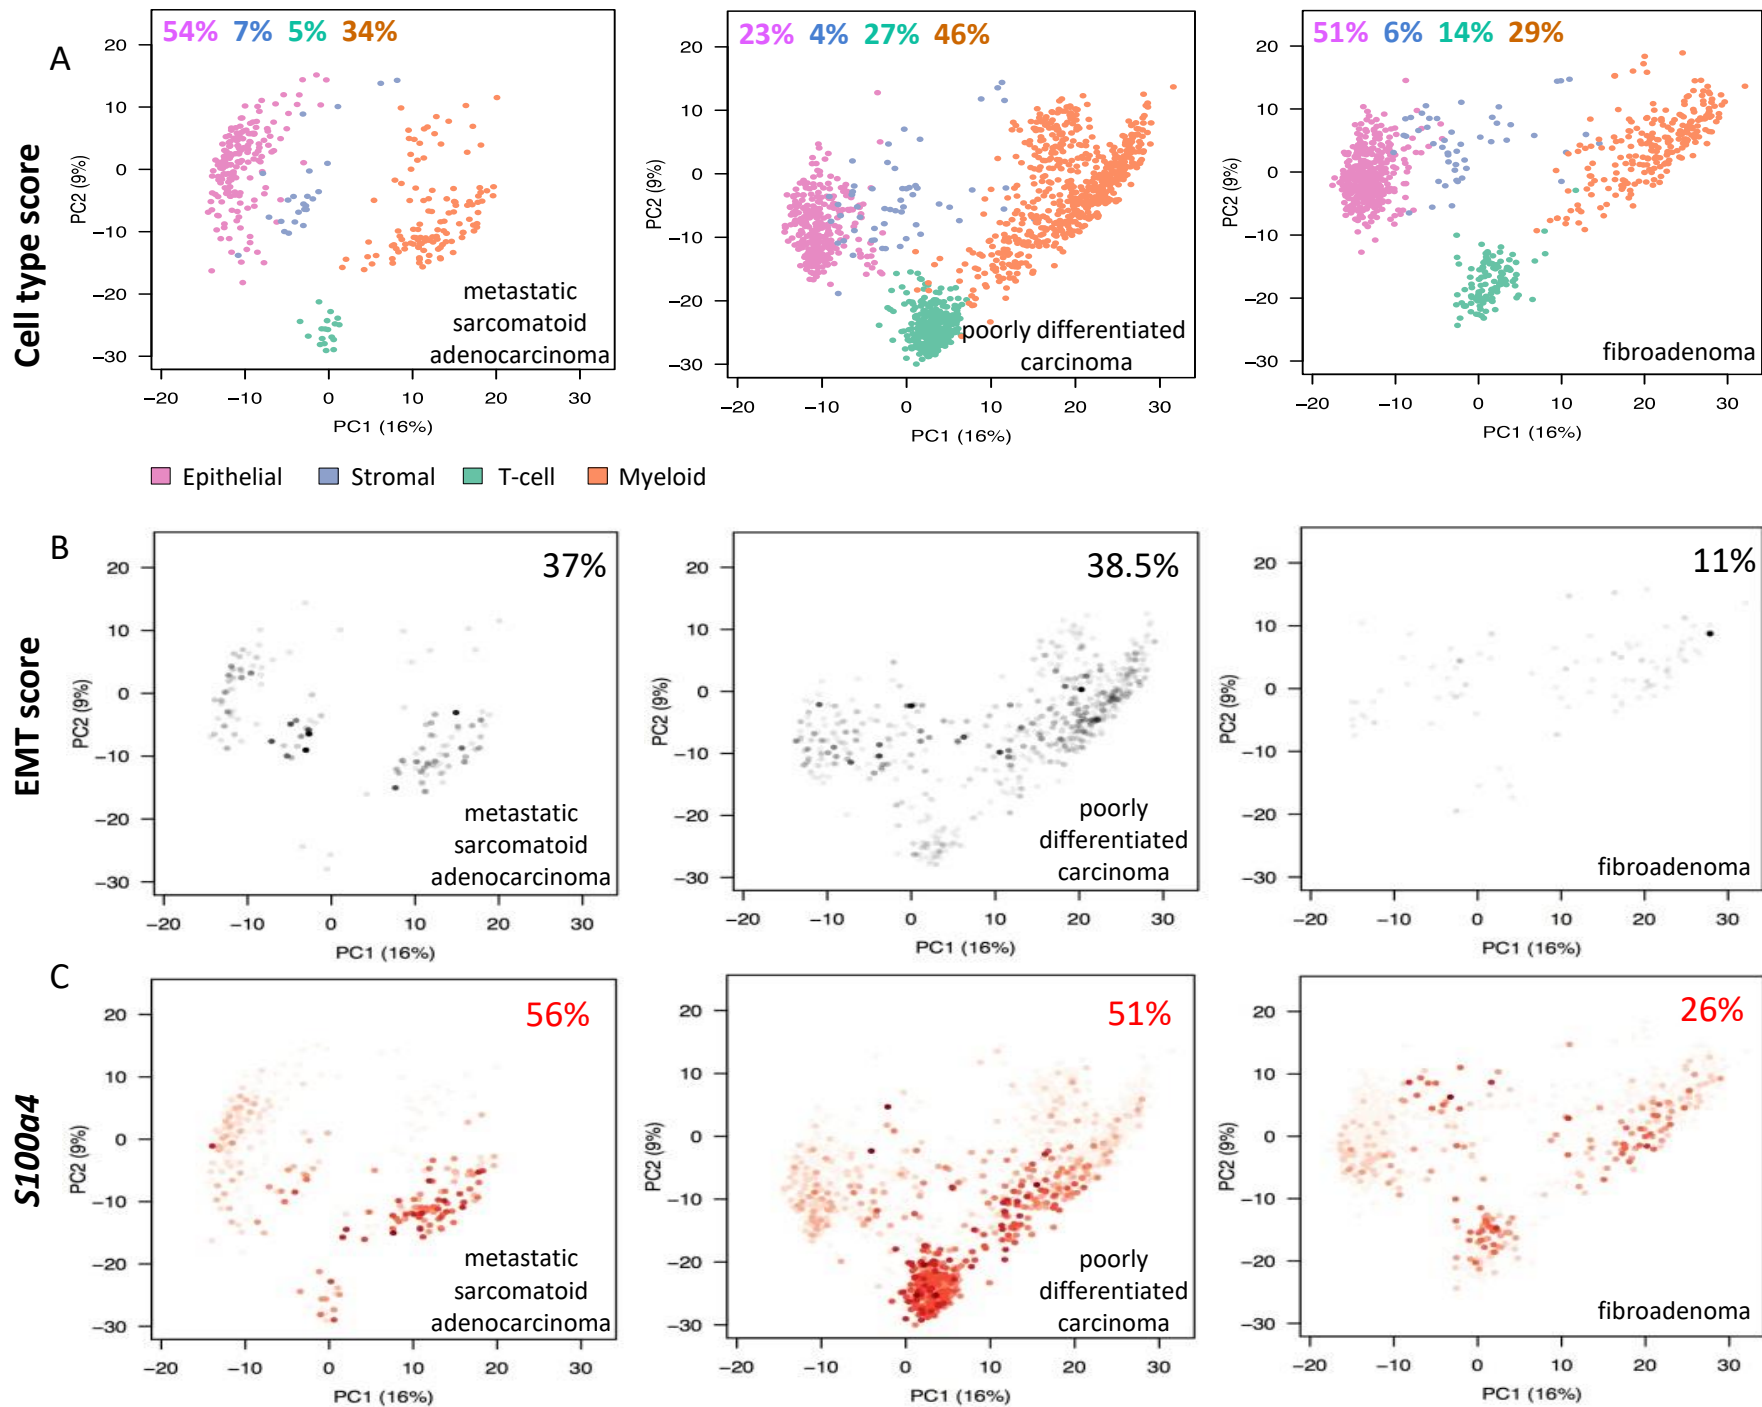

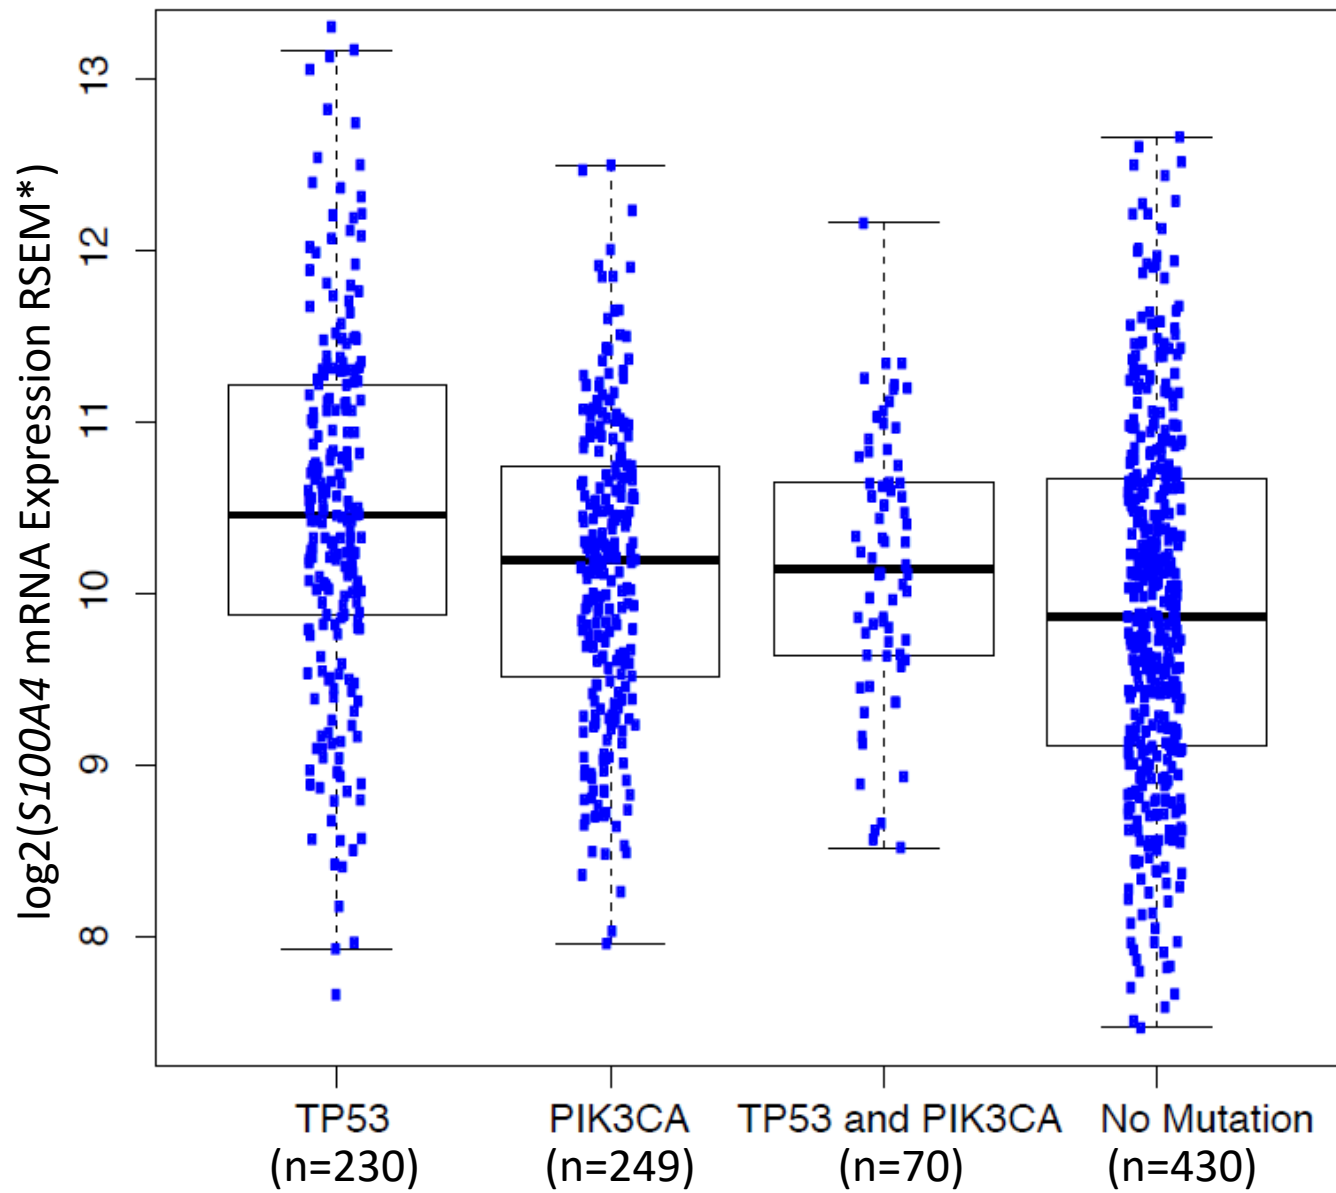



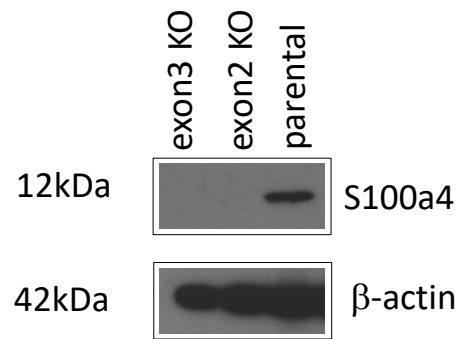

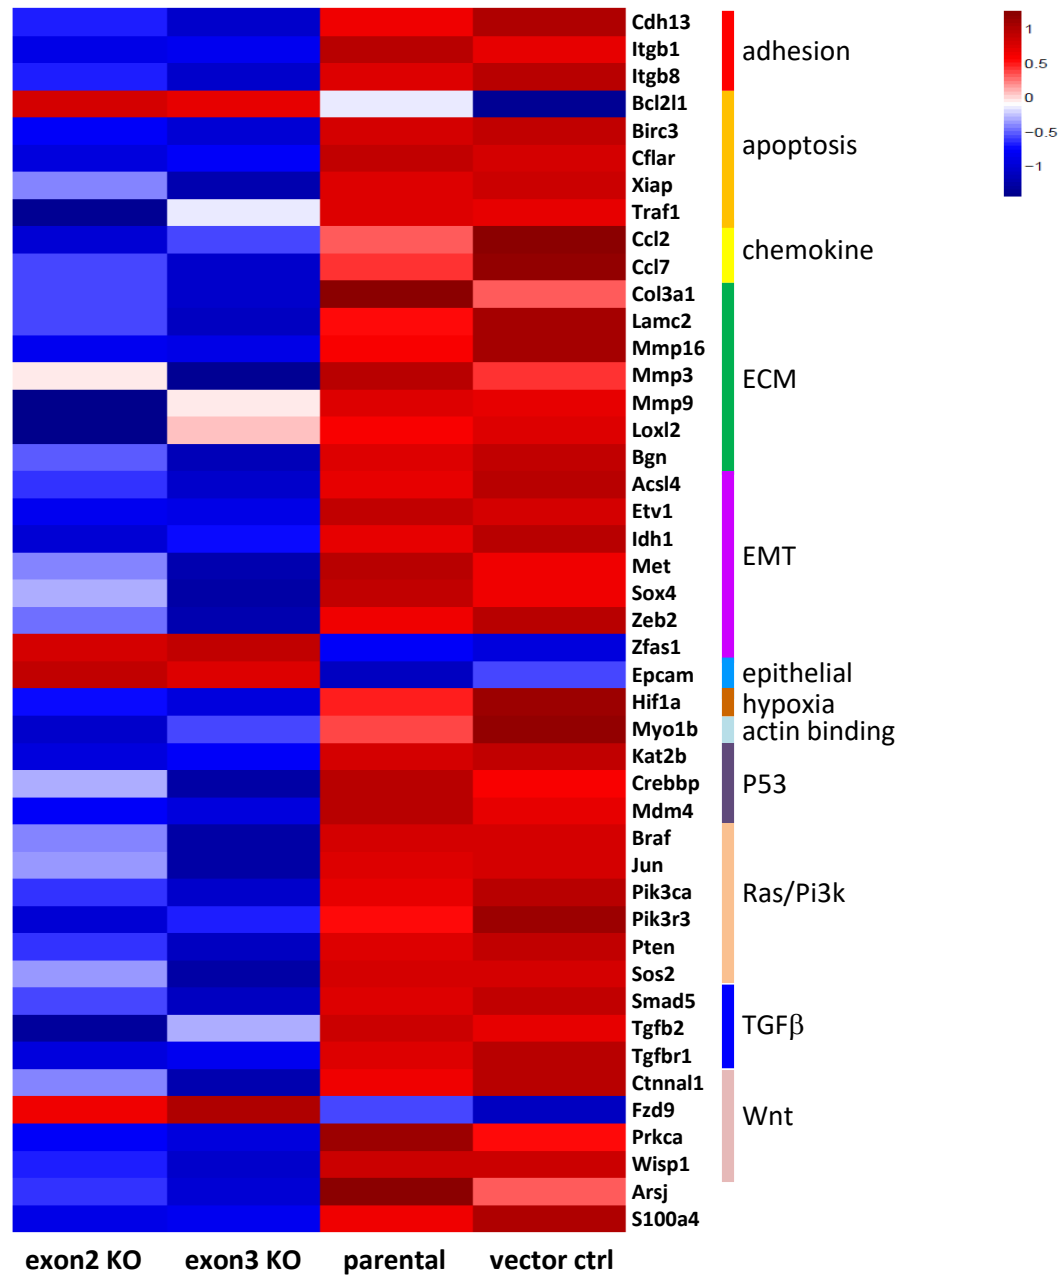

Supplementary Figure 10

Supplementary Table 1. Summary of allelic frequency in the *S100a4* knockout lines

|                | exon2 KO | exon3 KO | outcome               |
|----------------|----------|----------|-----------------------|
| wt             | 6.8%     | 0.1%     |                       |
| del 1bp        | 37.7%    | 49.4%    | truncation of protein |
| del 2bp        | 3.1%     | 23.2%    | truncation of protein |
| del 3bp        | 0.6%     | 8.9%     | delete 1 amino acid   |
| del 4bp        |          | 12.8%    | truncation of protein |
| del 12bp       |          | 5.2%     | delete 4 amino acids  |
| del 15bp       | 51.9%    |          | delete 5 amino acids  |
| total deletion | 93.2%    | 99.9%    |                       |
